# Supplementary material
Source: MDPI journal article supplement (https://www.mdpi.com/2071-1050/15/7/5646)
Supplement: s1 [file s1]

Archive with 2 entries (2 files):
- sustainability-2205805-S1.pdf
- sustainability-2205805-S2.pdf
