# Supplementary material
Source: MDPI journal article supplement (https://www.mdpi.com/2071-1050/15/7/5646)
Supplement: s1 [file s1]

## PRISMA 2020 Main Checklist

| Topic                          | No. | Item                                                                                                                                                                                                                                                                                                 | Location where item is reported                                                                   |
|--------------------------------|-----|------------------------------------------------------------------------------------------------------------------------------------------------------------------------------------------------------------------------------------------------------------------------------------------------------|---------------------------------------------------------------------------------------------------|
| <b>TITLE</b>                   |     |                                                                                                                                                                                                                                                                                                      |                                                                                                   |
| <b>Title</b>                   | 1   | Identify the report as a systematic review.                                                                                                                                                                                                                                                          | Page 1, Line 3.                                                                                   |
| <b>ABSTRACT</b>                |     |                                                                                                                                                                                                                                                                                                      |                                                                                                   |
| <b>Abstract</b>                | 2   | See the PRISMA 2020 for Abstracts checklist                                                                                                                                                                                                                                                          |                                                                                                   |
| <b>INTRODUCTION</b>            |     |                                                                                                                                                                                                                                                                                                      |                                                                                                   |
| <b>Rationale</b>               | 3   | Describe the rationale for the review in the context of existing knowledge.                                                                                                                                                                                                                          | Page 2, Lines 11 - 57;<br>Page 3, Lines 58 - 76.                                                  |
| <b>Objectives</b>              | 4   | Provide an explicit statement of the objective(s) or question(s) the review addresses.                                                                                                                                                                                                               | Page 3, Lines 79 - 95;<br>Pages 6, Lines 205 - 222.                                               |
| <b>METHODS</b>                 |     |                                                                                                                                                                                                                                                                                                      |                                                                                                   |
| <b>Eligibility criteria</b>    | 5   | Specify the inclusion and exclusion criteria for the review and how studies were grouped for the syntheses.                                                                                                                                                                                          | Page 5, Lines 166, 168;<br>Page 6, Lines 175 - 176 and Lines 179 - 191.                           |
| <b>Information sources</b>     | 6   | Specify all databases, registers, websites, organizations, reference lists and other sources searched or consulted to identify studies. Specify the date when each source was last searched or consulted.                                                                                            | Page 5, Lines 150 - 154;<br>Page 6, Lines 193 - 201;<br>Page 16, Lines 536 - 594;<br>Pages 17-20. |
| <b>Search strategy</b>         | 7   | Present the full search strategies for all databases, registers and websites, including any filters and limits used.                                                                                                                                                                                 | Page 3, Lines 99 - 104; Page 5, Lines 154 - 165.                                                  |
| <b>Selection process</b>       | 8   | Specify the methods used to decide whether a study met the inclusion criteria of the review, including how many reviewers screened each record and each report retrieved, whether they worked independently, and if applicable, details of automation tools used in the process.                     | Page 4, Lines 112 - 142; Page 5, Lines 145 - 154; Page 6, Lines 174 - 201.                        |
| <b>Data collection process</b> | 9   | Specify the methods used to collect data from reports, including how many reviewers collected data from each report, whether they worked independently, any processes for obtaining or confirming data from study investigators, and if applicable, details of automation tools used in the process. | Not specified                                                                                     |

| Topic                                | No. | Item                                                                                                                                                                                                                                                                          | Location where item is reported                                             |
|--------------------------------------|-----|-------------------------------------------------------------------------------------------------------------------------------------------------------------------------------------------------------------------------------------------------------------------------------|-----------------------------------------------------------------------------|
| <b>Data items</b>                    | 10a | List and define all outcomes for which data were sought. Specify whether all results that were compatible with each outcome domain in each study were sought (e.g. for all measures, time points, analyses), and if not, the methods used to decide which results to collect. | Not specified                                                               |
|                                      | 10b | List and define all other variables for which data were sought (e.g. participant and intervention characteristics, funding sources). Describe any assumptions made about any missing or unclear information.                                                                  | Not specified                                                               |
| <b>Study risk of bias assessment</b> | 11  | Specify the methods used to assess risk of bias in the included studies, including details of the tool(s) used, how many reviewers assessed each study and whether they worked independently, and if applicable, details of automation tools used in the process.             | Not specified                                                               |
| <b>Effect measures</b>               | 12  | Specify for each outcome the effect measure(s) (e.g. risk ratio, mean difference) used in the synthesis or presentation of results.                                                                                                                                           | Not specified                                                               |
| <b>Synthesis methods</b>             | 13a | Describe the processes used to decide which studies were eligible for each synthesis (e.g. tabulating the study intervention characteristics and comparing against the planned groups for each synthesis (item 5)).                                                           | Page 7, Lines 224 – 239; Page 9, Lines 258 – 279; Page 10, Lines 280 – 281. |
|                                      | 13b | Describe any methods required to prepare the data for presentation or synthesis, such as handling of missing summary statistics, or data conversions.                                                                                                                         | Not specified                                                               |
|                                      | 13c | Describe any methods used to tabulate or visually display results of individual studies and syntheses.                                                                                                                                                                        | Page 9, Lines 258 – 279; Page 10, Lines 280 – 281.                          |
|                                      | 13d | Describe any methods used to synthesize results and provide a rationale for the choice(s). If meta-analysis was performed, describe the model(s), method(s) to identify the presence and extent of statistical heterogeneity, and software package(s) used.                   | Page 9, Lines 261 – 262; Page 14, Lines 476-477.                            |
|                                      | 13e | Describe any methods used to explore possible causes of heterogeneity among study results (e.g. subgroup analysis, meta-regression).                                                                                                                                          | Not specified                                                               |
|                                      | 13f | Describe any sensitivity analyses conducted to assess robustness of the synthesized results.                                                                                                                                                                                  | Not specified                                                               |
| <b>Reporting bias assessment</b>     | 14  | Describe any methods used to assess risk of bias due to missing results in a synthesis (arising from reporting biases).                                                                                                                                                       | Not specified                                                               |

| Topic                                | No. | Item                                                                                                                                                                                                                                                                                 | Location where item is reported                                                                                                       |
|--------------------------------------|-----|--------------------------------------------------------------------------------------------------------------------------------------------------------------------------------------------------------------------------------------------------------------------------------------|---------------------------------------------------------------------------------------------------------------------------------------|
| <b>Certainty assessment</b>          | 15  | Describe any methods used to assess certainty (or confidence) in the body of evidence for an outcome.                                                                                                                                                                                | Not specified                                                                                                                         |
| <b>RESULTS</b>                       |     |                                                                                                                                                                                                                                                                                      |                                                                                                                                       |
| <b>Study selection</b>               | 16a | Describe the results of the search and selection process, from the number of records identified in the search to the number of studies included in the review, ideally using a flow diagram.                                                                                         | Page 4, Lines 112 - 142                                                                                                               |
|                                      | 16b | Cite studies that might appear to meet the inclusion criteria, but which were excluded, and explain why they were excluded.                                                                                                                                                          | Page 4, Lines 131 - 137                                                                                                               |
| <b>Study characteristics</b>         | 17  | Cite each included study and present its characteristics.                                                                                                                                                                                                                            | Page 7, Lines 225 - 239; Page 9, Line 258 - 259 and Lines 261 - 279; Page 10, Lines 280 - 281; Page 16, Lines 536 - 594; Pages 17-20. |
| <b>Risk of bias in studies</b>       | 18  | Present assessments of risk of bias for each included study.                                                                                                                                                                                                                         | Not specified                                                                                                                         |
| <b>Results of individual studies</b> | 19  | For all outcomes, present, for each study: (a) summary statistics for each group (where appropriate) and (b) an effect estimates and its precision (e.g. confidence/credible interval), ideally using structured tables or plots.                                                    | Page 10, Lines 283 - 307; Pages 11 - 14.                                                                                              |
| <b>Results of syntheses</b>          | 20a | For each synthesis, briefly summarize the characteristics and risk of bias among contributing studies.                                                                                                                                                                               | Not specified                                                                                                                         |
|                                      | 20b | Present results of all statistical syntheses conducted. If meta-analysis was done, present for each the summary estimate and its precision (e.g. confidence/credible interval) and measures of statistical heterogeneity. If comparing groups, describe the direction of the effect. | Not specified                                                                                                                         |
|                                      | 20c | Present results of all investigations of possible causes of heterogeneity among study results.                                                                                                                                                                                       | Not specified                                                                                                                         |
|                                      | 20d | Present results of all sensitivity analyses conducted to assess the robustness of the synthesized results.                                                                                                                                                                           | Not specified                                                                                                                         |
| <b>Reporting biases</b>              | 21  | Present assessments of risk of bias due to missing results (arising from reporting biases) for each synthesis assessed.                                                                                                                                                              | Not specified                                                                                                                         |

| Topic                                                 | No. | Item                                                                                                                                                                                                                                       | Location where item is reported |
|-------------------------------------------------------|-----|--------------------------------------------------------------------------------------------------------------------------------------------------------------------------------------------------------------------------------------------|---------------------------------|
| <b>Certainty of evidence</b>                          | 22  | Present assessments of certainty (or confidence) in the body of evidence for each outcome assessed.                                                                                                                                        | Not specified                   |
| <b>DISCUSSION</b>                                     |     |                                                                                                                                                                                                                                            |                                 |
| <b>Discussion</b>                                     | 23a | Provide a general interpretation of the results in the context of other evidence.                                                                                                                                                          | Pages 15, Lines 502 - 522       |
|                                                       | 23b | Discuss any limitations of the evidence included in the review.                                                                                                                                                                            | Page 15, Lines 492 - 498        |
|                                                       | 23c | Discuss any limitations of the review processes used.                                                                                                                                                                                      | Page 15, Lines 480 - 492        |
|                                                       | 23d | Discuss implications of the results for practice, policy, and future research.                                                                                                                                                             | Page 16, Lines 524 - 532        |
| <b>OTHER INFORMATION</b>                              |     |                                                                                                                                                                                                                                            |                                 |
| <b>Registration and protocol</b>                      | 24a | Provide registration information for the review, including register name and registration number, or state that the review was not registered.                                                                                             | Not specified                   |
|                                                       | 24b | Indicate where the review protocol can be accessed, or state that a protocol was not prepared.                                                                                                                                             | Not specified                   |
|                                                       | 24c | Describe and explain any amendments to information provided at registration or in the protocol.                                                                                                                                            | Not specified                   |
| <b>Support</b>                                        | 25  | Describe sources of financial or non-financial support for the review, and the role of the funders or sponsors in the review.                                                                                                              | Not specified                   |
| <b>Competing interests</b>                            | 26  | Declare any competing interests of review authors.                                                                                                                                                                                         | Not specified                   |
| <b>Availability of data, code and other materials</b> | 27  | Report which of the following are publicly available and where they can be found: template data collection forms; data extracted from included studies; data used for all analyses; analytic code; any other materials used in the review. | Not specified                   |

*From:* Page MJ, McKenzie JE, Bossuyt PM, Boutron I, Hoffmann TC, Mulrow CD, et al. The PRISMA 2020 statement: an updated guideline for reporting systematic reviews. MetaArXiv. 2020, September 14. DOI: 10.31222/osf.io/v7gm2. For more information, visit: [www.prisma-statement.org](http://www.prisma-statement.org)
